# Supplementary material for: Characterization of the Particle Emission from Ships Operating atSea Using Unmanned Aerial Vehicles
Source: Copernicus journal article supplement (doi:10.5194/amt-2017-146), 2017-06-26
Supplement: Supplementary file 1 [file amt-2017-146-supplement.pdf]

1 **Supplementary Material (SM) For:**

2 **Characterization of the Particle Emission from Ships Operating**  
3 **at Sea Using Unmanned Aerial Vehicles**

4 Tommaso F. Villa<sup>1</sup>, Reece Brown<sup>1</sup>, E. Rohan Jayaratne<sup>1</sup>, L. Felipe Gonzalez<sup>2</sup>, Lidia Morawska<sup>1</sup>,  
5 Zoran D. Ristovski<sup>1\*</sup>

6 <sup>1</sup> International Laboratory for Air Quality and Health (ILAQH), Queensland University of Technology (QUT), 2  
7 George St, Brisbane QLD 4000

8 <sup>2</sup>Australian Research Centre for Aerospace Automation (ARCAA), Queensland University of Technology (QUT), 2  
9 George St, Brisbane QLD 4000

10 *Correspondence to: Zoran D. Ristovski (z.ristovski@qut.edu.au)*

11

12 Pages 1

13

14 Figures 1

15

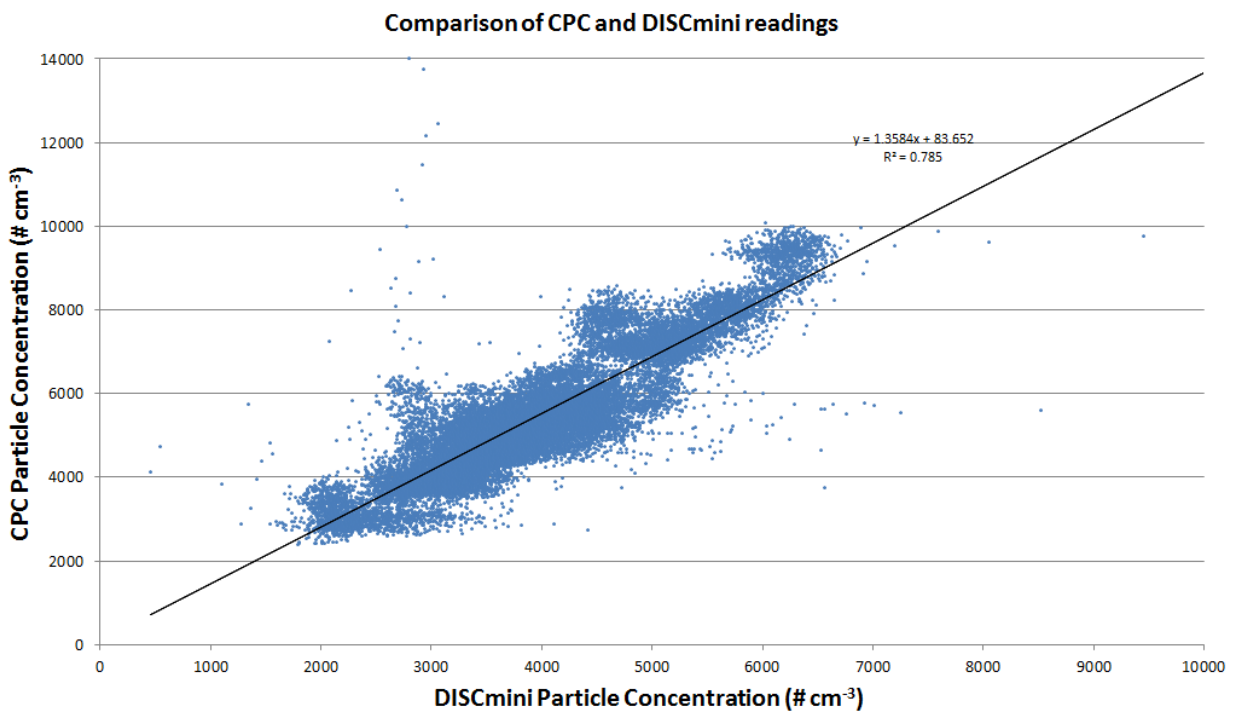

16

17 **Figure S1: Comparison of the DISCmini with the CPC in the aerosol laboratory onboard the investigator.**
