# Supplementary material for: Characterization of the Particle Emission from Ships Operating atSea Using Unmanned Aerial Vehicles
Source: Copernicus journal article supplement (doi:10.5194/amt-2017-146), 2017-06-26
Supplement: Supplementary file [file amt-2017-146-AC1-supplement.pdf]

1 **Supplementary Material (SM) For:**

2 **Characterization of the Particle Emission from Ships Operating**  
3 **at Sea Using Unmanned Aerial Vehicles**

4 Tommaso F. Villa<sup>1</sup>, Reece Brown<sup>1</sup>, E. Rohan Jayaratne<sup>1</sup>, L. Felipe Gonzalez<sup>2</sup>, Lidia Morawska<sup>1</sup>,  
5 Zoran D. Ristovski<sup>1\*</sup>

6 <sup>1</sup> International Laboratory for Air Quality and Health (ILAQH), Queensland University of Technology (QUT), 2  
7 George St, Brisbane QLD 4000

8 <sup>2</sup> Australian Research Centre for Aerospace Automation (ARCAA), Queensland University of Technology (QUT), 2  
9 George St, Brisbane QLD 4000

10 *Correspondence to:* Zoran D. Ristovski (z.ristovski@qut.edu.au)

11 The DISCmini was compared with a reference CPC (TSI 3772) for ambient measurements onboard the  
12 ship over a period of several hours. Linear regression of the data with an intercept set at origin resulted  
13 in an  $R^2$  value of 0.982. This regression equation was used to correct DISCmini concentrations in  
14 emission factor calculations.

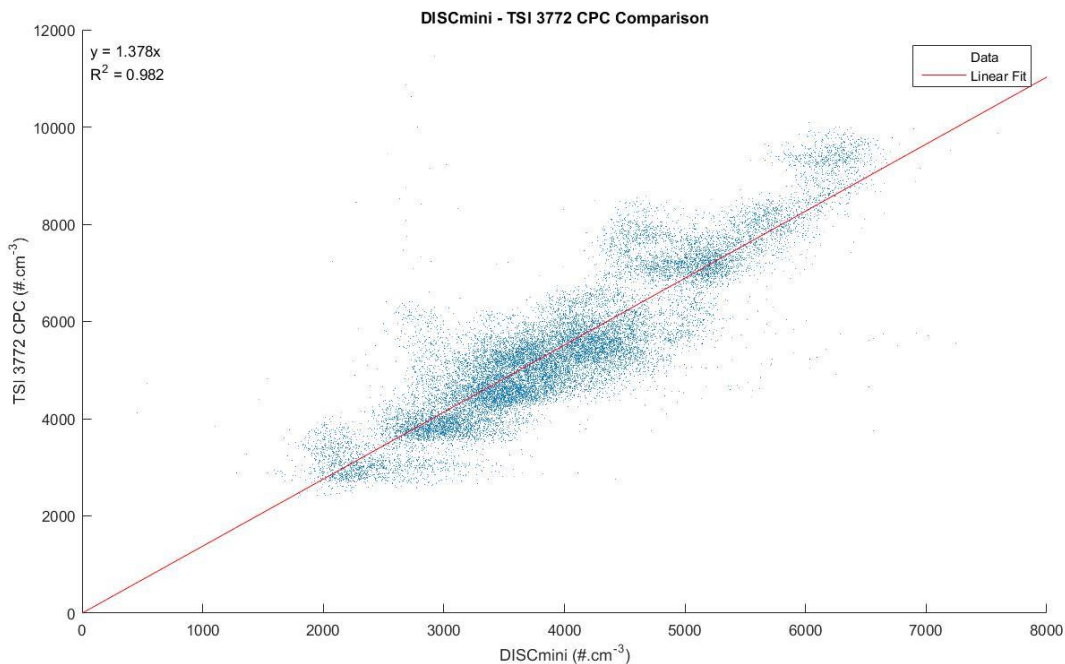

15  
16 **Figure S1: Comparison of the DISCmini with the CPC in the aerosol laboratory onboard the investigator.**

17

18 The IAQ-calc 7545 was compared with a PICARRO Greenhouse Gas Analyzer for ambient measurements  
19 onboard the ship over a period of several hours. It was found there was a positive offset of  $93 \pm 2$  ppm  
20 (standard error) of between the two measurements.

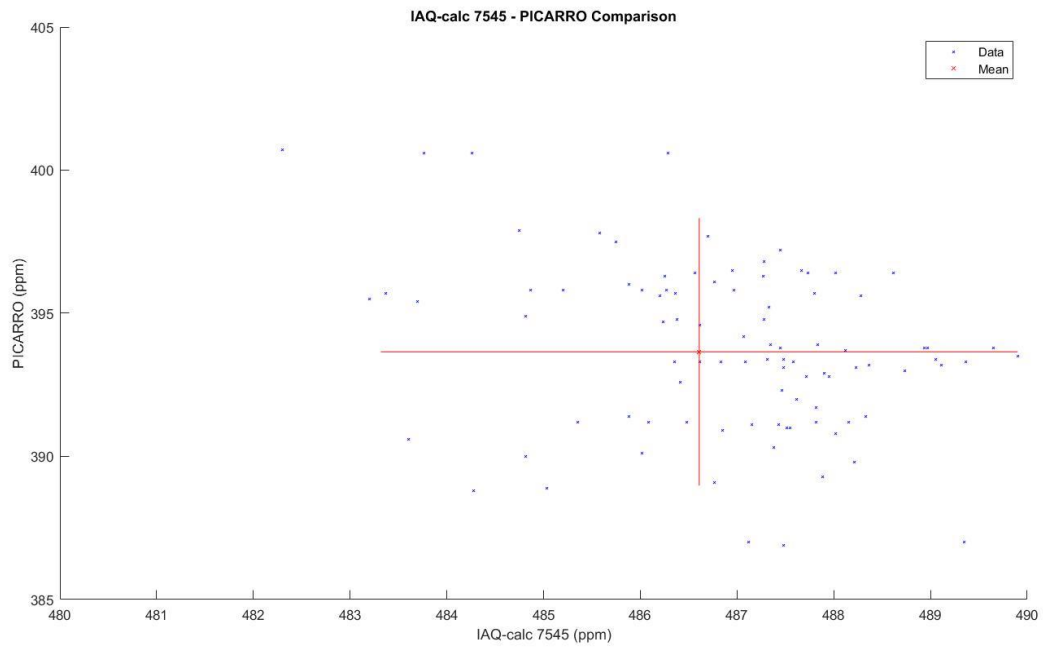

21

22 **Figure S2: Comparison of the IAQ-calc 7545 with the PICARRO in the aerosol laboratory onboard the investigator. Bars**  
23 **indicate the 95% confidence interval around the mean.**
